# Supplementary material for: Developmental genes significantly afflicted by aberrant promoter methylation and somatic mutation predict overall survival of late-stage colorectal cancer
Source: PubMed Central journal article supplement (PMC4686889; doi:10.1038/srep18616), 2015-12-22
Supplement: srep18616-s1.pdf [file srep18616-s1.pdf]

# **Developmental genes significantly afflicted by aberrant promoter methylation and somatic mutation predict overall survival of late-stage colorectal cancer**

Ning An<sup>1,\*</sup>, Xue Yang<sup>1,\*</sup>, Shujun Cheng<sup>1,†</sup>, Guiqi Wang<sup>2,†</sup>, and Kaitai Zhang<sup>1,†</sup>

<sup>1</sup> State Key Laboratory of Molecular Oncology, Department of Etiology and Carcinogenesis, Peking Union Medical College & Cancer Institute (Hospital), Chinese Academy of Medical Sciences, Beijing, 100021, China

<sup>2</sup> Department of Endoscopy, Cancer Hospital, Chinese Academy of Medical Sciences, Beijing, 100021, China

\* These authors contributed equally to this work.

† Correspondence and requests for materials should be addressed to G.W. (wangguiq@126.com), K.Z. (zhangkt\_bingyin@sina.cn) or S.C. (chengshj@263.net.cn)

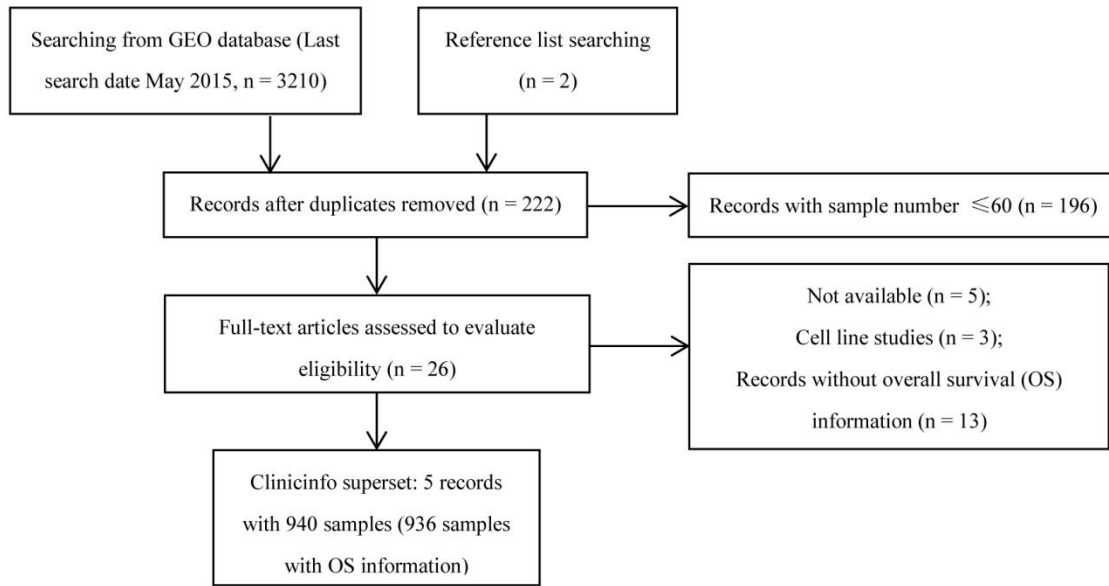

**Supplementary Figure S1. Schematic of Clinicoinfo dataset collection.**

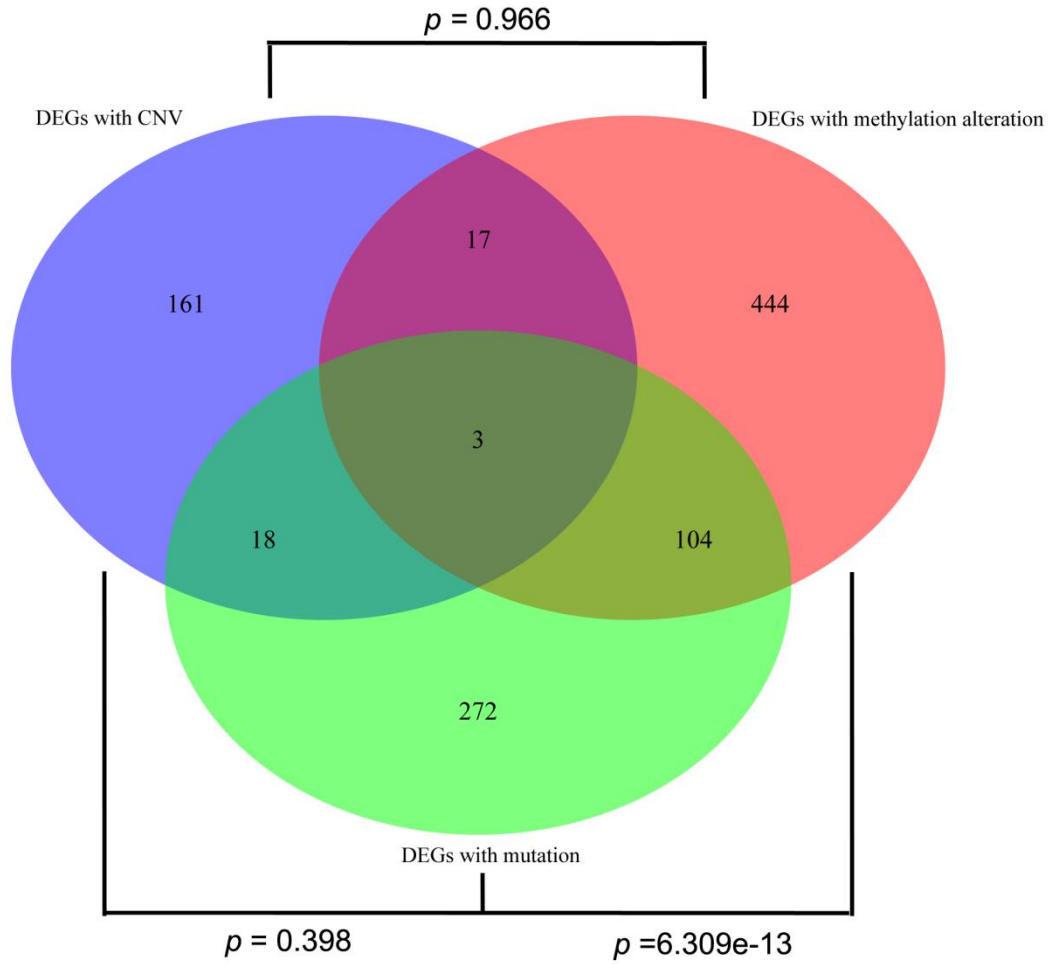

**Supplementary Figure S2. Overlapping among three candidate gene groups.** The statistical significance of overlapping was calculated via hypergeometric distribution, and the corresponding  $p$  value was presented between each two gene groups.

### Overall concordance index analysis

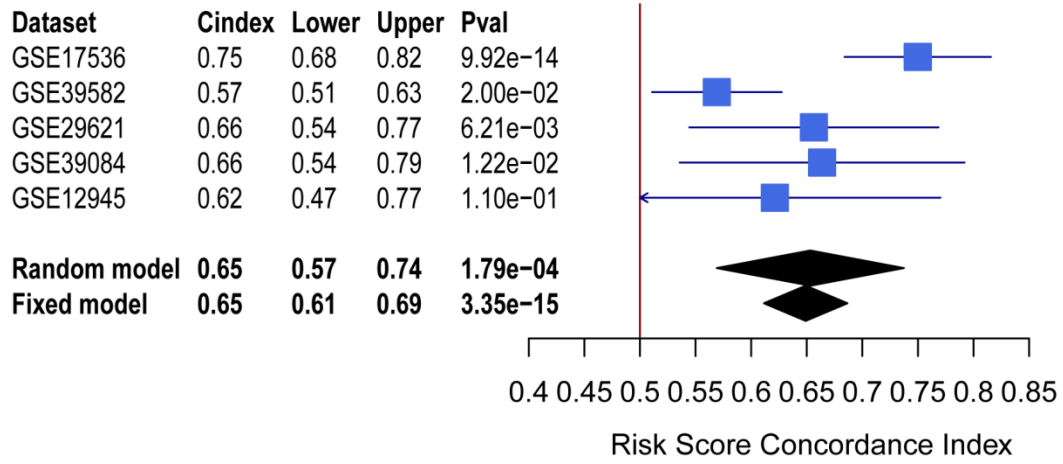

**Supplementary Figure S3. Forest plot of overall concordance index analysis to evaluate the predictive ability of the 37-gene signature.**
